# Supplementary material
Source: Springer Nature journal article supplement (https://www.springermedizin.de/resource/supplementary/12889_2007_1175_MOESM10_ESM.pdf/9502618)

# The Voucher Flow

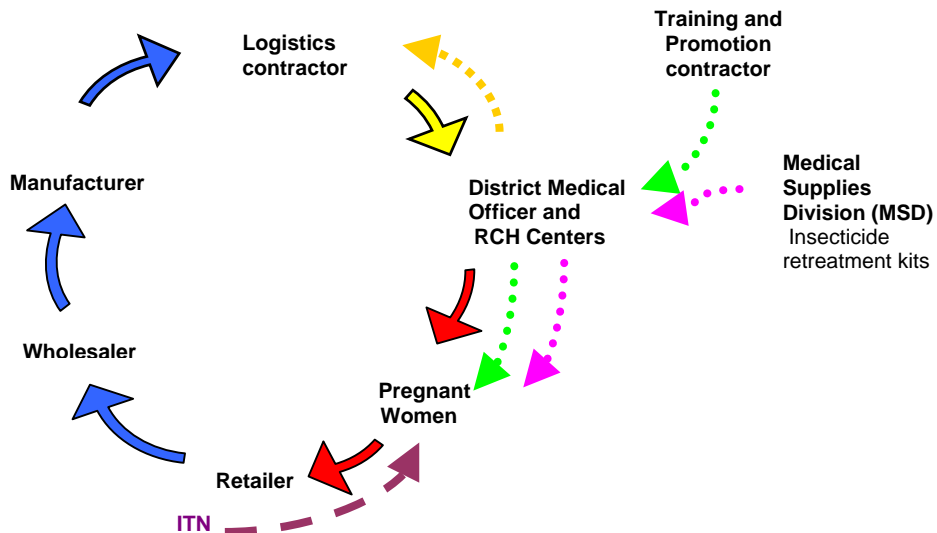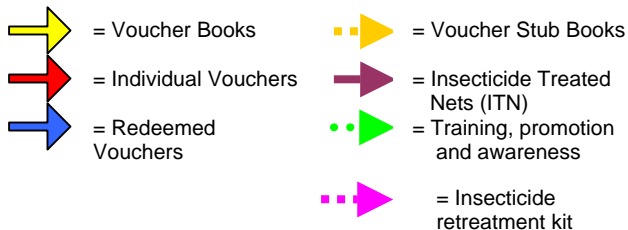

Supplement: MOESM10 [file 9502618]
